# Supplementary material for: High Detection Frequency of Vaccine-Associated Polioviruses and Non-Polio Enteroviruses in the Stools of Asymptomatic Infants from the Free State Province, South Africa
Source: MDPI journal article supplement (doi:10.3390/microorganisms12050920), 2024-04-30
Supplement: s1 [file s1]

Supplementary material S1

Genome coverage maps of enterovirus B subtypes

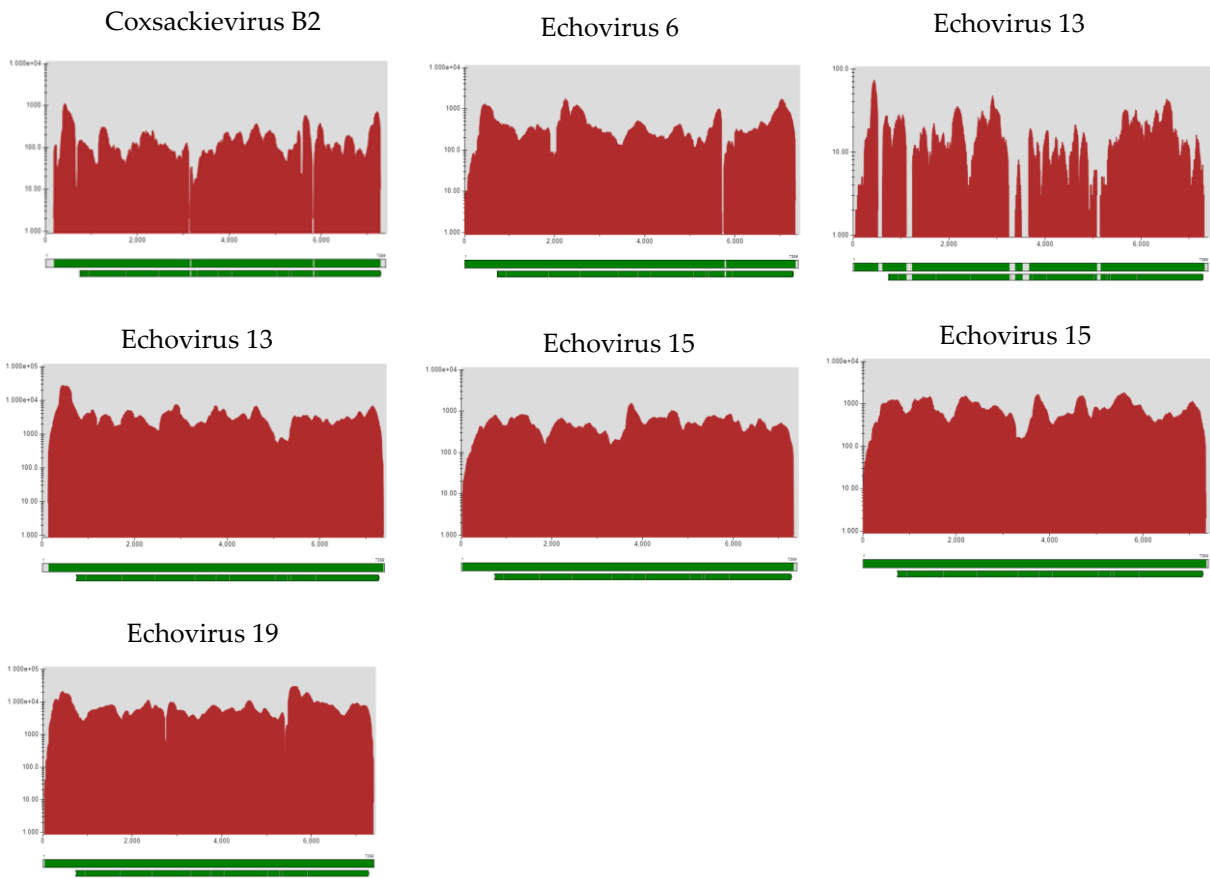

Figure S1: Genome coverage maps of the seven enterovirus B subtypes identified (coxsackievirus B2, echovirus 6, 13, 15, and 19).

Genome coverage maps of enterovirus C subtypes

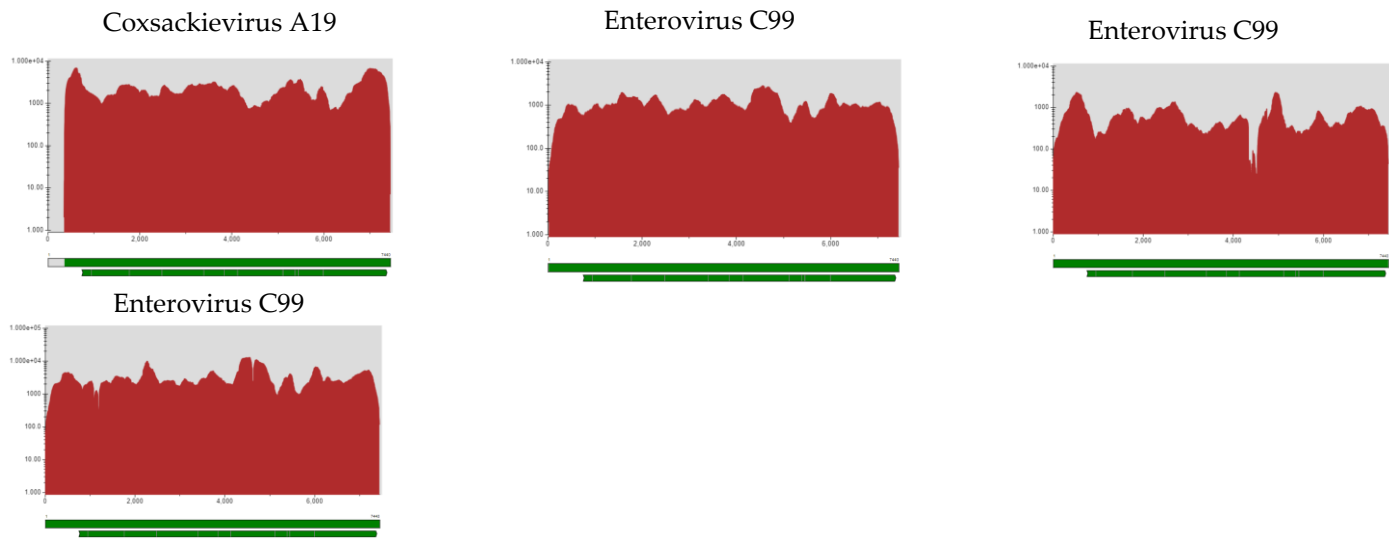

Figure S2: Genome coverage maps of the seven enterovirus C subtypes identified (coxsackievirus A19, Enterovirus C99).
